# Supplementary material for: First-principles investigation of CuBiSeCl 2 : a quaternary halide chalcogenide material for advanced optoelectronic and thermoelectric energy harvesting and conversion technologies
Source: Royal Society of Chemistry journal article supplement (doi:10.1039/d5ma01386k), 2026-01-01
Supplement: d5ma01386k1.pdf [file d5ma01386k1.pdf]

## Supplementary Information

### First-Principles Investigation of $\text{CuBiSeCl}_2$ : A Quaternary Halide Chalcogenide Material for Advanced Optoelectronic and Thermoelectric Energy Harvesting and Conversion Technologies

Zihad Hossain<sup>1</sup>, Md. Riad Khan<sup>1</sup>, Sanzida Naznin Mim<sup>1</sup>, Md. Emon Hassan<sup>1</sup>, Mohammad Abdur Rashid<sup>2</sup>,  
Md. Lokman Ali<sup>1\*</sup>

<sup>1</sup>Department of Physics, Pabna University of Science and Technology, Pabna-6600, Bangladesh

<sup>2</sup>Department Physics, Jashore University of Science and Technology Jashore 7408, Bangladesh

Corresponding Author's e-mail: lokman.cu12@gmail.com

#### Supplementary Methods:

#### Basis set convergence test

To ensure the reliability of our calculations, we carefully performed a basis set convergence test with respect to the  $\text{RK}_{\text{max}}$  parameter ( $\text{R}_{\text{MT}} \times \text{R}_{\text{max}}$ ). The total energy was monitored as a function of  $\text{RK}_{\text{max}}$ , as illustrated in Fig.1.

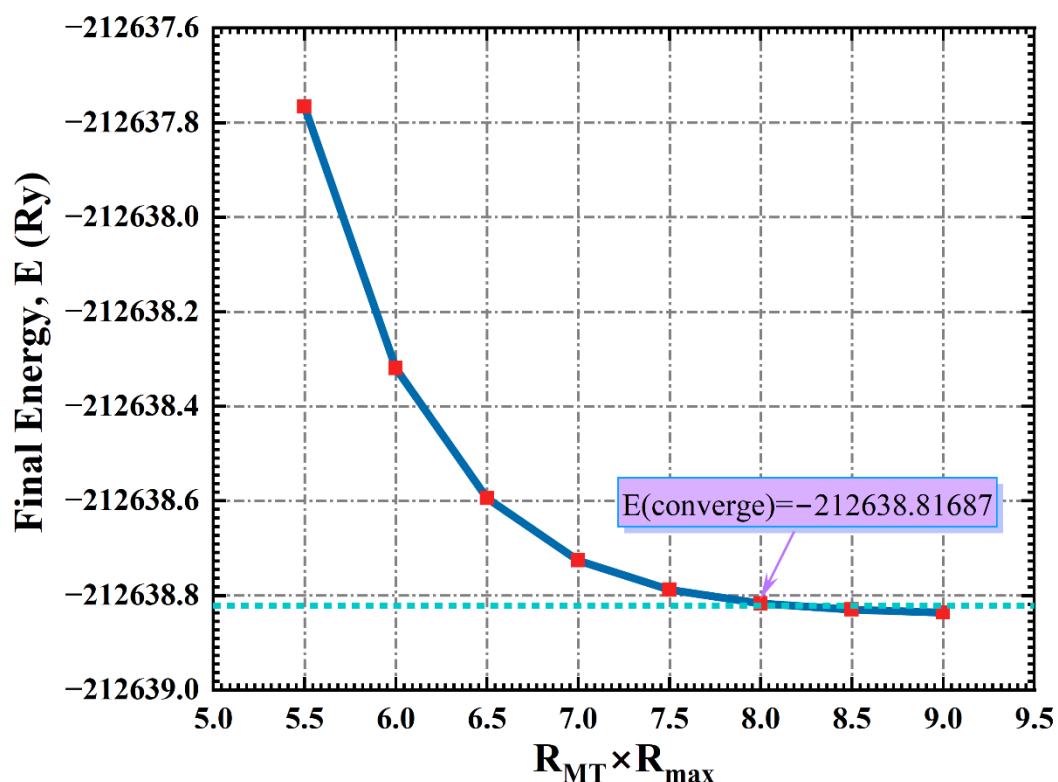

**Fig. 1.** Converge curve, the total energy is a function of  $\text{RK}_{\text{max}}$ .

The results show that the total energy decreases sharply at lower  $\text{RK}_{\text{max}}$  values and gradually approaches a constant value beyond  $\text{RK}_{\text{max}} = 8.0$ . The converged total energy was obtained as

$E = -212638.81687$  Ry, and further increase of  $RK_{\max}$  from 8.0 to 9.0 resulted in a negligible energy variation of less than  $1 \times 10^{-4}$  Ry ( $\approx 1.36$  meV/atom). This indicates that the total energy and derived quantities are fully converged with respect to  $RK_{\max}$ . Therefore,  $RK_{\max} = 8.0$  was adopted for all subsequent calculations, as it ensures numerical stability and an optimal balance between accuracy and computational cost. The convergence criterion was set so that the change in total energy remained below  $1 \times 10^{-4}$  Ry, which is a standard and rigorous threshold for accurate first-principles simulations. Additionally, we verified that increasing  $RK_{\max}$  beyond the converged value did not alter the band structure, density of states, or optical properties, confirming that our chosen cutoff provides a stable and reliable energy baseline for all physical analyses.

**Table S1.** Calculated converge data of  $RK_{\max}$  and total energy.

| <b>Rkmax</b> | <b>Total Energy</b> |
|--------------|---------------------|
| 5.0          | -212636.7181        |
| 5.5          | -212637.7664        |
| 6.0          | -212638.3197        |
| 6.5          | -212638.5945        |
| 7.0          | -212638.7263        |
| 7.5          | -212638.788         |
| 8.0          | -212638.8169        |
| 8.5          | -212638.8302        |
| 9.0          | -212638.8363        |

## Formation Enthalpy and Cohesive Energy

**Table S2:** Calculated formation enthalpy and cohesive energy

| Total enthalpy of<br>CuBiSeCl <sub>2</sub> | Isolated Energy in eV |             |            |           | Cohecrive<br>energy in<br>eV/atom |
|--------------------------------------------|-----------------------|-------------|------------|-----------|-----------------------------------|
|                                            | Cu                    | Bi          | Se         | Cl        |                                   |
| -53179.8414                                | -3307.3865            | -43163.0142 | -4860.4467 | -921.6282 | -15.613                           |
| Total enthalpy of<br>CuBiSeCl <sub>2</sub> | Bulk Energy in eV     |             |            |           | Formation<br>Energy in<br>eV/atom |
|                                            | Cu                    | Bi          | Se         | Cl        |                                   |
| -53179.8414                                | -3309.6858            | -43163.0717 | -4860.2954 | -922.8887 | -2.7514                           |

## 2.1. Optical Constants: Calculation Methods

The frequency-dependent complex dielectric function is given by:

$$\varepsilon(\omega) = \varepsilon_1(\omega) + i\varepsilon_2(\omega) \quad (1)$$

where  $\varepsilon_1(\omega)$  represents the real part, and  $\varepsilon_2(\omega)$  accounts imaginary part. In cartesian coordinates,

$$\varepsilon(\omega) = \begin{pmatrix} \varepsilon_{xx}(\omega) & \varepsilon_{xy}(\omega) & \varepsilon_{xz}(\omega) \\ \varepsilon_{yx}(\omega) & \varepsilon_{yy}(\omega) & \varepsilon_{yz}(\omega) \\ \varepsilon_{zx}(\omega) & \varepsilon_{zy}(\omega) & \varepsilon_{zz}(\omega) \end{pmatrix} \quad (2)$$

At long-wavelength infrared (LWIR) wavelengths for the intra-band transitions the overall dielectric function can be represented by,

$$\varepsilon(\omega) = \varepsilon^{inter}(\omega) + \varepsilon^{intra}(\omega) \quad (3)$$

The derivation of the inter-band component of the dielectric function from first-order time-dependent perturbation theory [1],

$$\varepsilon_{\alpha\beta}^{inter}(\omega) = 1 - \frac{8\pi e^2}{\Omega} \sum_{k,v,c} \frac{\langle \psi_{k+qe}^c | e^{iq \cdot r} | \psi_k^v \rangle \langle \psi_k^v | e^{-iq \cdot r} | \psi_{k+qe}^c \rangle}{(E_{k+q}^c - E_k^v - \hbar\omega - i\hbar\alpha)} + CC \quad (4)$$

In this formulation,  $\Omega$  represents the volume of a single unit cell, the parameter  $q$  captures the photon momentum,  $\omega$  symbolizes the phonon frequency,  $r$  defines the position vector, the elementary charge of an electron is represented by  $e$ . Furthermore,  $E_k^v$  and  $E_{k+q}^c$  correspond to the wavefunctions of electrons in the valence and conduction bands at a specific wavevector  $k$ . Using the Kramers-Kronig relation,

$$\varepsilon_1^{inter}(\omega) = 1 + \frac{2}{\pi} P \int_0^\infty \frac{\omega' \varepsilon_2^{inter}(\omega') d\omega'}{\omega'^2 - \omega^2} \quad (5)$$

With the help of the free-electron plasma model, the intra-band contributions to the dielectric function,

$$\varepsilon^{inter}(\omega) = 1 - \frac{\omega_p^2}{\omega(\omega + i\gamma)} \quad (6)$$

Herein, The inverse lifetime ( $\gamma$ ) may vary from 0 to 1 eV [2] and the complex optical conductivity ( $\omega$ ) is established based on the following relation:

$$\sigma(\omega) = -i \frac{\omega}{4\pi} [\varepsilon(\omega) - 1] \quad (7)$$

However, the optical properties can be determined with the help of the following equations [3]:

$$K(\omega) = \frac{I(\omega)}{2\omega} \quad (8)$$

$$I(\omega) = \sqrt{2}\omega \left( \sqrt{\varepsilon_1(\omega)^2 + \varepsilon_2(\omega)^2} - \varepsilon_1(\omega) \right)^{1/2} \quad (9)$$

$$L(\omega) = \frac{E}{(\varepsilon_1(\omega)^2 + \varepsilon_2(\omega)^2)} \quad (10)$$

$$r(\omega) = \frac{n + iK - 1}{n + iK + 1} \quad (11)$$

$$n(\omega) = \left( \frac{1}{\sqrt{2}} \right) \left( \sqrt{\varepsilon_1(\omega)^2 + \varepsilon_2(\omega)^2} - \varepsilon_1(\omega) \right)^{1/2} \quad (12)$$

$$\varepsilon_1(\omega) = n^2 - K^2 \quad (13)$$

$$\varepsilon_2(\omega) = 2nK \quad (14)$$

$$\sqrt{\varepsilon(\omega)} = n(\omega) + iK(\omega) \quad (15)$$

## 2.2. Methods of elastic and mechanical properties

The mechanical performance of solids is fundamentally governed by the elastic stiffness constants  $C_{ij}$ , which describe the linear relationship between stress and strain within the elastic regime. These constants offer crucial insights into a material's structural stability, dynamic response, and hardness. To determine the elastic constants, stress - strain methods are employed, where small deformations are applied to the crystal structure to observe its mechanical response [4]. The expression below is used to compute the stress that counteracts the applied strain and restores equilibrium:

$$\begin{pmatrix} \sigma_1 \\ \sigma_2 \\ \sigma_3 \\ \tau_1 \\ \tau_2 \\ \tau_3 \end{pmatrix} = \begin{pmatrix} C_{11} & C_{12} & C_{13} & C_{14} & C_{15} & C_{16} \\ C_{21} & C_{22} & C_{23} & C_{24} & C_{25} & C_{26} \\ C_{31} & C_{32} & C_{33} & C_{34} & C_{35} & C_{36} \\ C_{41} & C_{42} & C_{43} & C_{44} & C_{45} & C_{46} \\ C_{51} & C_{52} & C_{53} & C_{54} & C_{55} & C_{56} \\ C_{61} & C_{62} & C_{63} & C_{64} & C_{65} & C_{66} \end{pmatrix} \begin{pmatrix} \varepsilon_1 \\ \varepsilon_2 \\ \varepsilon_3 \\ \gamma_1 \\ \gamma_2 \\ \gamma_3 \end{pmatrix} \quad (16)$$

The symbols  $\sigma_{ij}$ ,  $\tau_{ij}$ ,  $\epsilon_{ij}$  and  $\gamma_i$  represents normal stress, Eulerian strain, and shear stress, respectively. This equation demonstrates how Hooke's law relates the stresses ( $\sigma_{ij}$ ,  $\tau_{ij}$ ) to their corresponding strains ( $\epsilon_{ij}$ ,  $\gamma_i$ ) in a material.

Due to the lattice symmetry of the crystal structure, there are nine independent elastic constants:  $C_{11}, C_{12}, C_{13}, C_{22}, C_{23}, C_{33}, C_{44}, C_{55}$ , and  $C_{66}$ . For orthorhombic crystals at zero pressure, the mechanical stability must satisfy the Born stability criteria, which are expressed as follows: [5,6]:

$$\left\{ \begin{array}{l} C_{11} > 0; C_{22} > 0; C_{33} > 0; \\ C_{44} > 0; C_{55} > 0; C_{66} > 0; \\ [C_{11} + C_{22} + C_{33} + 2(C_{12} + C_{13} + C_{23})] > 0; \\ (C_{11} + C_{33} - 2C_{12}) > 0; \\ (C_{11} + C_{33} - 2C_{13}) > 0; \\ (C_{11} + C_{33} - 2C_{23}) > 0 \end{array} \right\} \quad (17)$$

The shear moduli (G) and bulk moduli (B) can be calculated using the Voigt-Reuss-Hill (VRH) approximation method [5,7,8]:

$$\left\{ \begin{array}{l} B_H = \frac{1}{2}(B_R + B_v) \\ G_H = \frac{1}{2}(G_R + G_v) \end{array} \right\} \quad (18)$$

Here,  $B_v$  and  $B_R$  are the upper and lower bounds of the bulk modulus, calculated using the Voigt and Reuss methods. The Voigt Reuss bounds for B and G in the orthorhombic configuration are presented as follows:

$$\left\{ \begin{array}{l} B_v = \frac{(C_{11} + C_{22} + C_{33}) + 2(C_{12} + C_{13})}{9} \\ B_R = \frac{[C_{11} * (C_{22} + C_{33} - 2 * C_{23}) + C_{22} * (C_{33} - 2 * C_{13}) - (2 * C_{33} * C_{12}) + C_{12} * (2 * C_{23} - C_{12}) + C_{13} * (2 * C_{12} - C_{13}) + C_{23} * (2 * C_{13} - C_{23})]}{\Delta} \\ G_v = \frac{C_{11} + C_{22} + C_{33} + 3 * (C_{44} + C_{55} + C_{66}) - (C_{12} + C_{13} + C_{23})}{15} \\ G_R = \frac{[4\{C_{11} * (C_{22} + C_{33} + C_{23}) + C_{22} * (C_{33} + C_{13}) + C_{33} * C_{12} - C_{12} * (C_{23} + C_{12}) - C_{13} * (C_{12} + C_{13}) - C_{23} * (C_{13} + C_{23})\}]/\Delta + 3\{(1/C_{44}) + (1/C_{55}) + (1/C_{66})\}]}{15} \end{array} \right\} \quad (19)$$

Young's modulus (Y) and Poisson's ratio (v) were determined, using the following formulas,

$$\left\{ \begin{array}{l} Y = \frac{9B_H G_H}{3B_H + G_H} \\ v = \frac{3B_H - 2G_H}{2(3B_H + G_H)} \end{array} \right\} \quad (20)$$

To gain deeper insights into the mechanical behavior of  $\text{CuBiSeCl}_2$ , additional parameters such as the Kleinman parameter ( $\zeta$ ), machinability index ( $\mu_m$ ) were evaluated, as summarized in Table 4. The following formula were utilized to obtain them,

$$\left\{ \begin{array}{l} \zeta = \frac{C_{11} + 8C_{12}}{7C_{11} + 2C_{12}} \\ \mu_M = \frac{B}{C_{44}} \\ \lambda = \frac{\nu E}{(1 + \nu)(1 - 2\nu)} \end{array} \right\} \quad (21)$$

Hardness is a key mechanical property that reflects a material's resistance to deformation or indentation. In this study, the hardness of  $\text{CuBiSeCl}_2$  was estimated using the theoretical model proposed by Chen et al. [9], along with additional semi-empirical formulas for hardness prediction [10]. The relevant equations are as follows:

$$\left\{ \begin{array}{l} H_1 = 0.0963B \\ H_2 = 0.0607E \\ H_3 = 0.1475G \\ H_4 = 0.0635E \\ H_5 = -2.899 + 0.1769G \\ H_6 = \frac{(1 - 2\nu)B}{6(1 + \nu)} \\ H_7 = \frac{(1 - 2\nu)E}{6(1 + \nu)} \\ H_8 = 2(k^2 G)^{0.585} - 3 = H_v \end{array} \right\} \quad (22)$$

Where  $B$  and  $G$  are Bulk and Shear modulus in GPa and  $k = \frac{G}{B} = \frac{1}{\text{Pugh's ratio}}$ .

The direction dependent characteristics of solids can be explained by anisotropy. To estimate elastic anisotropy, the universal index ( $A^U$ ) is utilized [11].

$$\left\{ A^U = 5 \frac{G_V}{G_R} + \frac{B_V}{G_R} - 6 \right\} \quad (23)$$

Some additional indicators of anisotropy are, shear anisotropy ( $A^G$ ), [12], Zener anisotropy factor ( $A^Z$ ), bulk anisotropy ( $A^B$ ), equivalent Zener anisotropy factor ( $A^{eq}$ ) [13], log-Euclidean index ( $A^L$ ) [12] are obtained by the below relations [14],

$$\left\{ A^G = \frac{G_v - G_R}{2G_H} \right\} \quad (24)$$

$$\left\{ A_1 = \frac{4C_{44}}{C_{11} + C_{33} - 2C_{13}} \right\} \quad (25)$$

$$\left\{ A_2 = \frac{4C_{55}}{C_{22} + C_{33} - 2C_{23}} \right\} \quad (26)$$

$$\left\{ A_3 = \frac{4C_{66}}{C_{11} + C_{22} - 2C_{12}} \right\} \quad (27)$$

$$\left\{ A^B = \frac{B_V - B_R}{B_V + B_R} \right\} \quad (28)$$

$$\left\{ A^Z = \frac{2C_{44}}{(C_{11} - C_{12})} \right\} \quad (29)$$

$$\left\{ A^{eq} = \left( 1 + \frac{5}{12} A^U \right) + \sqrt{\left( 1 + \frac{5}{12} A^U \right)^2 - 1} \right\} \quad (30)$$

$$\left\{ A^L = \sqrt{\left[ \ln \left( \frac{B_V}{B_R} \right) + 5 \left[ \ln \left( \frac{C_{44}^V}{C_{44}^R} \right) \right]^2} \right\} \quad (31)$$

Here,  $C_{44}^V$  is the  $C_{44}$  values for Voigt and  $C_{44}^R$  is the same for Reuss, which can be expressed as-

$$\left\{ \begin{aligned} C_{44}^R &= \frac{5 C_{44}(C_{11} - C_{12})}{33(C_{11} - C_{12}) + 4C_{44}} \\ C_{44}^V &= \frac{3(C_{11} - C_{12} - 2C_{44})^2}{53(C_{11} - C_{12}) + 4C_{44}} \end{aligned} \right\} \quad (32)$$

#### Supplementary Results:

### 3. Results and Discussion

#### 3.1. Structural Analysis with Ground-State Properties

**Table S3:** Energy configuration with volume.

| Volume (Bohr <sup>3</sup> ) | Volume (Å <sup>3</sup> ) | ΔVol (%) | Total Energy (Ry) |
|-----------------------------|--------------------------|----------|-------------------|
| 2958.426                    | 438.4444                 | -5       | -212638.71641     |
| 2989.567                    | 443.1787                 | -4       | -212638.72147     |
| 3020.709                    | 447.913                  | -3       | -212638.72531     |
| 3051.85                     | 452.6473                 | -2       | -212638.72739     |
| 3082.992                    | 457.3817                 | -1       | -212638.72847     |
| 3114.133                    | 462.116                  | 0        | -212638.72742     |
| 3145.274                    | 466.8503                 | 1        | -212638.72552     |
| 3176.416                    | 471.5847                 | 2        | -212638.72238     |
| 3207.557                    | 476.319                  | 3        | -212638.71812     |
| 3238.698                    | 481.0533                 | 4        | -212638.71275     |
| 3269.839                    | 485.7876                 | 5        | -212638.70622     |

**Table S4:** Lattice parameters

| Parameters        |   | PBEsol   | Exp.     | Relative errors |
|-------------------|---|----------|----------|-----------------|
| Lattice Constants | a | 8.75477  | 8.78415  | 0.38%           |
|                   | b | 3.98466  | 3.998    | 0.34%           |
|                   | c | 13.09603 | 13.13998 | 0.36%           |

### 3.2. Electronic Properties



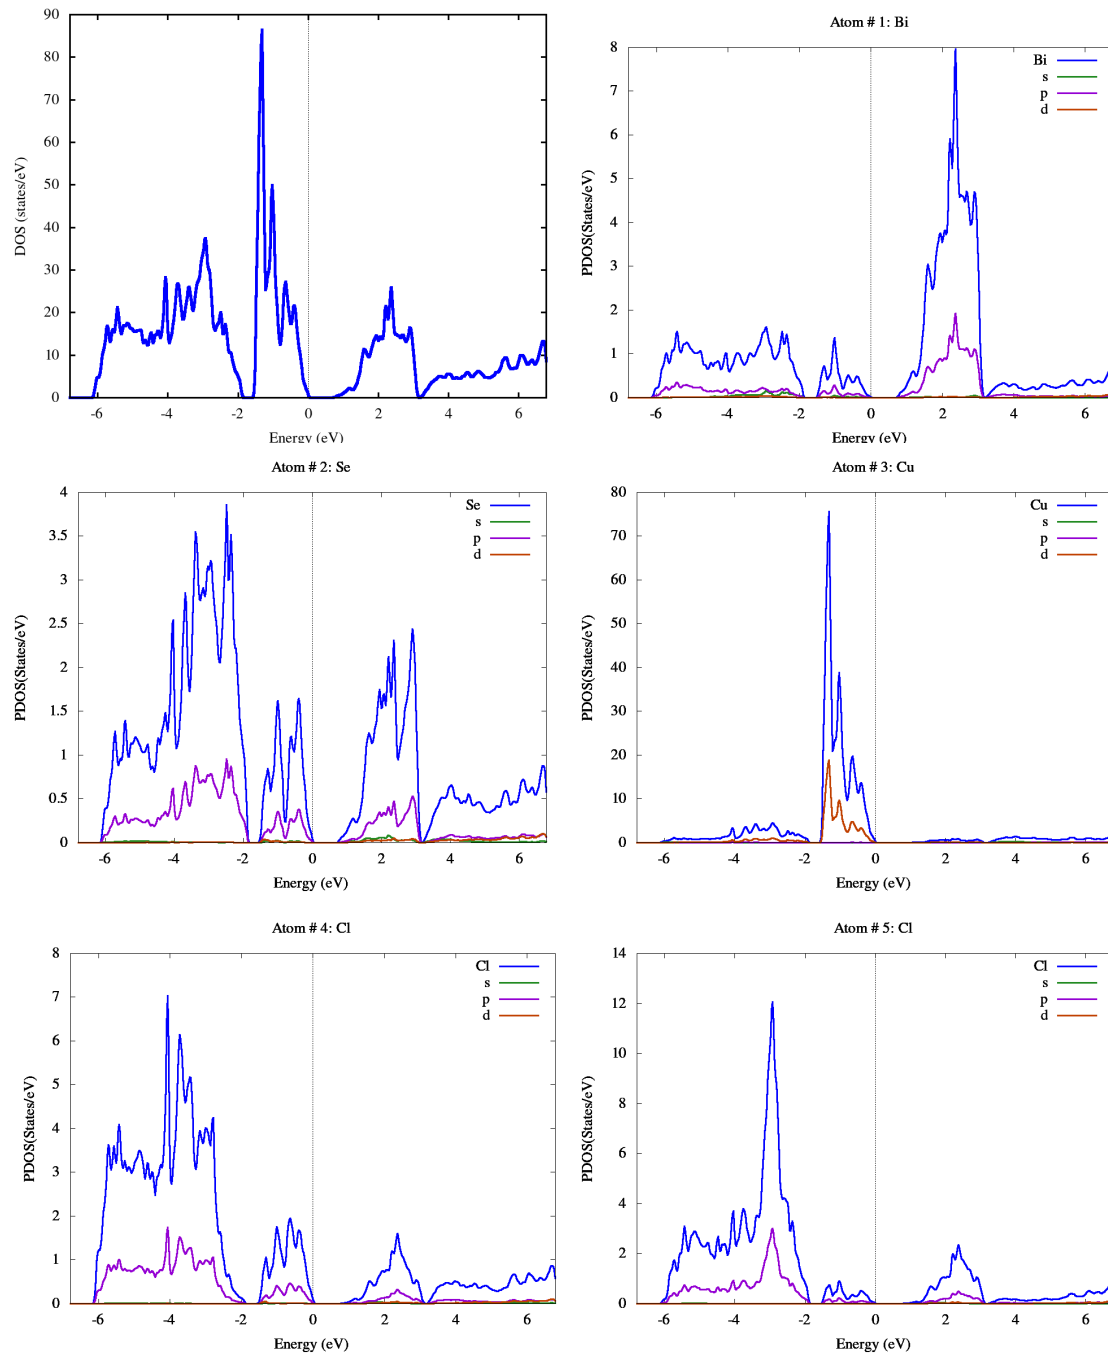

**Fig. S2:** Element- and orbital-resolved (s, p, d) PDOS analysis of  $\text{CuBiSeCl}_2$ .

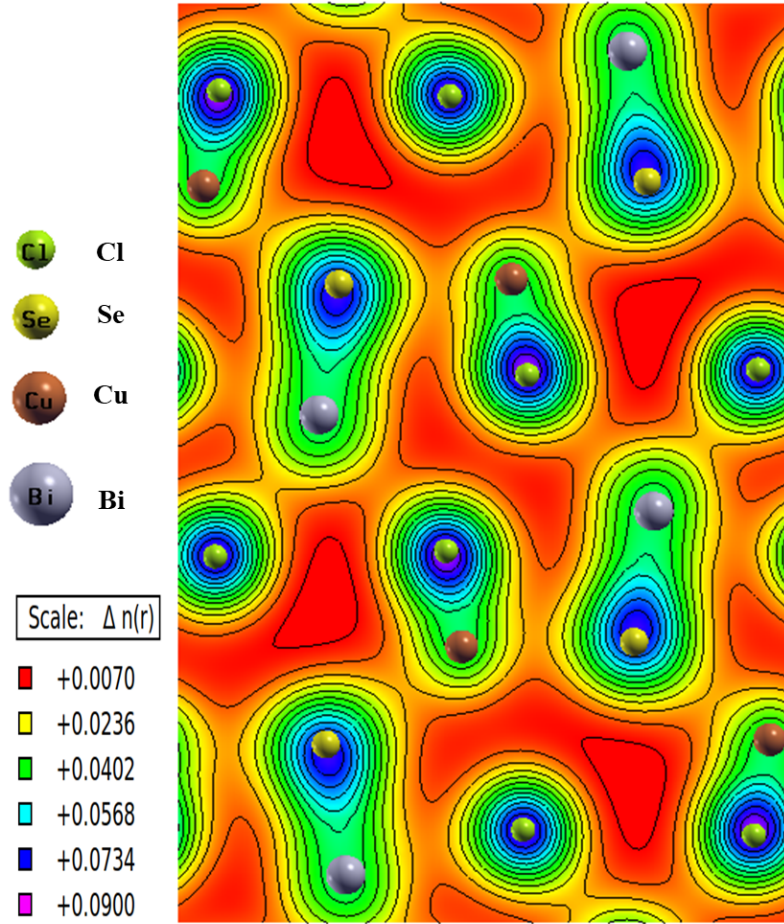

**Fig. S3:** Charge density analysis for Cu, Bi, Se, and Cl in  $CuBiSeCl_2$ .

## References:

- [1] S. Bharadwaj, T. Van Mechelen, Z. Jacob, Picophotonics: Anomalous Atomistic Waves in Silicon, *Phys. Rev. Applied* 18 (2022) 044065.  
<https://doi.org/10.1103/PhysRevApplied.18.044065>.
- [2] M.J. Van Setten, S. Er, G. Brocks, R.A. De Groot, G.A. De Wijs, First-principles study of the optical properties of  $Mg_xTi_{1-x}H_2$ , *Phys. Rev. B* 79 (2009) 125117.  
<https://doi.org/10.1103/PhysRevB.79.125117>.
- [3] Md.L. Ali, Z. Hossain, S.N. Mim, S.K. Saha, Pressure Effects on Physical Properties of Binary Rare Earth Mono-Pnictide YBi for Optoelectronics Applications, *Advanced Theory and Simulations* n/a (n.d.) 2401066. <https://doi.org/10.1002/adts.202401066>.
- [4] A. Dal Corso, Elastic constants of beryllium: a first-principles investigation, *Journal of Physics: Condensed Matter* 28 (2016) 075401.

- [5] Z. Wu, E. Zhao, H. Xiang, X. Hao, X. Liu, J. Meng, Crystal structures and elastic properties of superhard Ir N<sub>2</sub> and Ir N<sub>3</sub> from first principles, *Phys. Rev. B* 76 (2007) 054115. <https://doi.org/10.1103/PhysRevB.76.054115>.
- [6] H. Ozisik, K. Colakoglu, H.B. Ozisik, E. Deligoz, Structural, elastic, and lattice dynamical properties of Germanium diiodide (GeI<sub>2</sub>), *Computational Materials Science* 50 (2010) 349–355. <https://doi.org/10.1016/j.commatsci.2010.08.026>.
- [7] R. Hill, The Elastic Behaviour of a Crystalline Aggregate, *Proc. Phys. Soc. A* 65 (1952) 349. <https://doi.org/10.1088/0370-1298/65/5/307>.
- [8] D.G. Pettifor, Theoretical predictions of structure and related properties of intermetallics, *Materials Science and Technology* 8 (1992) 345–349. <https://doi.org/10.1179/mst.1992.8.4.345>.
- [9] X.-Q. Chen, H. Niu, D. Li, Y. Li, Modeling hardness of polycrystalline materials and bulk metallic glasses, *Intermetallics* 19 (2011) 1275–1281.
- [10] M.I. Naher, S.H. Naqib, Possible applications of Mo<sub>2</sub>C in the orthorhombic and hexagonal phases explored via ab-initio investigations of elastic, bonding, optoelectronic and thermophysical properties, *Results in Physics* 37 (2022) 105505.
- [11] D. Engin, C. Kemal, C.Y. Oztekin, Ab initio study on hypothetical silver nitride, *Chinese Physics Letters* 25 (2008) 2154.
- [12] C.M. Kube, Elastic anisotropy of crystals, *AIP Advances* 6 (2016). <https://pubs.aip.org/aip/adv/article/6/9/095209/873497> (accessed August 17, 2024).
- [13] S.I. Ranganathan, M. Ostoja-Starzewski, Universal Elastic Anisotropy Index, *Phys. Rev. Lett.* 101 (2008) 055504. <https://doi.org/10.1103/PhysRevLett.101.055504>.
- [14] R. Gaillac, P. Pullumbi, F.-X. Coudert, ELATE: an open-source online application for analysis and visualization of elastic tensors, *Journal of Physics: Condensed Matter* 28 (2016) 275201.
